# Supplementary material
Source: PubMed Central journal article supplement (PMC6269245)
Supplement: kwy181_xiao_web_material_final.pdf [file kwy181_xiao_web_material_final.pdf]

**Ten-Year Change in Neighborhood Socioeconomic Deprivation and Rates of Total, Cardiovascular Disease, and  
Cancer Mortality in Older US Adults**

Qian Xiao, David Berrigan, Tiffany Powell-Wiley, and Charles E. Matthews

**Table of Contents**

Web Appendix

Web Tables 1–8

Web Figure 1

## Web Appendix—Methods

### *Neighborhood socioeconomic deprivation*

Baseline addresses from 1995–1996 were geocoded to latitude/longitude and linked to the 1990 and 2000 US Census at the census tract level. In total, there were 17,850 census tracts in our study. We applied an adapted version of the method developed by Messer et al.<sup>1</sup> and Major et al.<sup>2</sup> to generate an empirical neighborhood socioeconomic deprivation index for both census years where higher deprivation meant lower neighborhood socioeconomic status (SES). In brief, we selected 14 census tract-variables present in both 1990 and 2000 censuses that were related to seven components of the neighborhood environment (housing characteristics, residential stability, poverty, employment, occupation, racial composition, and education). We performed principal component analysis (PCA) on these variables, stratified by state, and retained variables with the consistently loadings across states and in both census years. More specifically, a variable is retained when at least one loading was in the upper 20% of all the 224 variable loadings ( $>0.33$ ) and with no loading lower than 90% ( $<0.06$ ). We retained six variables, including % total with less than high school, % total unemployed, % households with income below poverty, % households with an income  $< \$22,500$  (1990) or  $< \$30,000$  (2000), % households on public assistance, and % households with no car. Using the retained variables, we re-ran the PCA for the whole cohort for 1990 and 2000 separately. We used the final item loadings to weight each of the six variable's contribution to the deprivation index for each census tract in 1990 and 2000. The loadings of census variables across states and in the deprivation index are presented in **Web Table 1**. To assess whether the specific method used to construct the neighborhood deprivation index has a large impact on our results, we performed sensitivity analyses using two additional indicators of neighborhood deprivation: 1) a deprivation index derived from all 14 census variables; and 2) % households with income below poverty. To characterize changes in neighborhood conditions, we created tertiles in both 1990 and 2000 based on the deprivation index and jointly classified the census tracts into nine categories, including consistently low (T1) (reference group), medium (T2), and high deprivation (T3) in 1990 and 2000. The six remaining categories included three categories with improvements in neighborhood SES between 1990 and 2000 (T3 in 1990 to T2 in 2000, T3 to T1, and T2 to T1) and three categories with worsening of neighborhood SES between the time periods (T1 in 1990 to T2 in 2000, T1 to T3, and T2 to T3). To examine the dose-response relationship between changes in neighborhood deprivation and mortality, we further calculated the difference in the percentiles for the deprivation index between 1990 and 2000. Changes in individual census variable between the two censuses according to different categories of percentile changes in the neighborhood deprivation index are presented in **Web Table 2**.

### *Statistical analysis: model selection and inverse probability weighting*

In all our models, we adjusted for potential confounders including demographic characteristics (age and race/ethnicity), education as an individual-level SES indicator, and state of residence. We also considered a wide range of variables that could serve as both confounders and mediators, including lifestyle and medical history (smoking, Healthy Eating Index (HEI), BMI, vigorous physical activity, TV viewing, self-rated health, and history of heart disease, stroke, diabetes and cancer). Because the role of these variables in the causal pathway is complicated and controlling of them only had a small effect ( $<2\%$  change in effect estimates when adjusted individually and  $<5\%$  change when all aforementioned variables were adjusted in the model) on our results, we did

not include them in our final analysis. We further considered the role of neighborhood socioeconomic deprivation in 1990: on one hand, it may confound the relationship between changes in neighborhood deprivation and mortality; on the other hand, as pointed out by earlier studies,<sup>3</sup> controlling for baseline variable while studying changes in such variable may induce bias. Therefore, we presented results from models with and without adjustment for neighborhood deprivation in 1990.

Finally, because a large proportion (44%) of the baseline cohort were excluded primarily due to moving out of the neighborhood or death before 2000, we compared study characteristics between those who were included and those excluded (**Web Table 3**). Although the study characteristics appeared to be largely comparable between the two groups, some small differences were noted. Therefore we conducted sensitivity analysis using inverse probability weighting to account for the potential impact of exclusions.<sup>4</sup> Briefly, we calculated a probability score of being included in the analytic cohort using multiple logistic regression that included the deprivation index in both 1990 and 2000, as well as all the study characteristics shown in **Web Table 3**, and then used the reciprocal of the score as weight in the analysis.

**Web Table 1.** State-specific and overall loadings of census variables

|                                                         | CA    |       | FL    |       | GA    |       | LA    |       | MI    |       | NC    |       | NJ    |       | PA    |       | Overall |      |
|---------------------------------------------------------|-------|-------|-------|-------|-------|-------|-------|-------|-------|-------|-------|-------|-------|-------|-------|-------|---------|------|
|                                                         | 1990  | 2000  | 1990  | 2000  | 1990  | 2000  | 1990  | 2000  | 1990  | 2000  | 1990  | 2000  | 1990  | 2000  | 1990  | 2000  | 1990    | 2000 |
| <b>Variables used included in deprivation index</b>     |       |       |       |       |       |       |       |       |       |       |       |       |       |       |       |       |         |      |
| Percent of total with less than high school             | 0.32  | 0.31  | 0.34  | 0.33  | 0.28  | 0.30  | 0.30  | 0.30  | 0.31  | 0.29  | 0.29  | 0.29  | 0.31  | 0.32  | 0.28  | 0.28  | 0.40    | 0.41 |
| Percent of total unemployed                             | 0.34  | 0.32  | 0.31  | 0.29  | 0.33  | 0.31  | 0.33  | 0.31  | 0.32  | 0.31  | 0.30  | 0.27  | 0.32  | 0.29  | 0.33  | 0.29  | 0.40    | 0.38 |
| Percent of HH with income below poverty                 | 0.35  | 0.36  | 0.37  | 0.37  | 0.34  | 0.34  | 0.34  | 0.35  | 0.34  | 0.33  | 0.35  | 0.35  | 0.34  | 0.35  | 0.34  | 0.34  | 0.44    | 0.45 |
| Percent of HH income < \$22,500                         | 0.35  | 0.35  | 0.33  | 0.32  | 0.33  | 0.35  | 0.33  | 0.34  | 0.37  | 0.32  | 0.34  | 0.35  | 0.32  | 0.33  | 0.33  | 0.33  | 0.42    | 0.42 |
| Percent of HH on public assistance                      | 0.35  | 0.33  | 0.35  | 0.33  | 0.32  | 0.31  | 0.33  | 0.30  | 0.31  | 0.32  | 0.34  | 0.33  | 0.33  | 0.31  | 0.34  | 0.32  | 0.41    | 0.40 |
| Percent of HH with no car                               | 0.26  | 0.27  | 0.29  | 0.30  | 0.32  | 0.32  | 0.31  | 0.31  | 0.30  | 0.31  | 0.33  | 0.34  | 0.33  | 0.33  | 0.32  | 0.33  | 0.37    | 0.38 |
| <b>Variables not used included in deprivation index</b> |       |       |       |       |       |       |       |       |       |       |       |       |       |       |       |       |         |      |
| Percent of Unemployed Men                               | 0.32  | 0.30  | 0.28  | 0.26  | 0.31  | 0.29  | 0.31  | 0.30  | 0.31  | 0.30  | 0.27  | 0.25  | 0.30  | 0.27  | 0.32  | 0.29  | NA      | NA   |
| Percent of renter occupied housing units                | 0.23  | 0.25  | 0.17  | 0.25  | 0.20  | 0.23  | 0.13  | 0.20  | 0.25  | 0.23  | 0.16  | 0.23  | 0.26  | 0.29  | 0.20  | 0.25  | NA      | NA   |
| Percent of housing units vacant                         | 0.07  | 0.08  | -0.04 | -0.03 | 0.18  | 0.18  | 0.20  | 0.18  | 0.06  | 0.24  | 0.04  | 0.05  | 0.08  | 0.09  | 0.10  | 0.18  | NA      | NA   |
| Median value of all owner occupied housing units        | -0.26 | -0.24 | -0.23 | -0.22 | -0.18 | -0.19 | -0.23 | -0.23 | -0.30 | -0.21 | -0.26 | -0.25 | -0.22 | -0.20 | -0.24 | -0.23 | NA      | NA   |
| Percent of female headed HH with dependent children     | 0.29  | 0.29  | 0.27  | 0.30  | 0.30  | 0.29  | 0.27  | 0.29  | 0.23  | 0.29  | 0.29  | 0.31  | 0.30  | 0.30  | 0.29  | 0.30  | NA      | NA   |
| Percent of non-Hispanic (NH) blacks.                    | 0.15  | 0.15  | 0.29  | 0.29  | 0.29  | 0.27  | 0.29  | 0.30  | 0.18  | 0.27  | 0.28  | 0.30  | 0.23  | 0.24  | 0.23  | 0.25  | NA      | NA   |
| Percent of residents 65 years and over                  | -0.01 | -0.08 | -0.02 | -0.10 | 0.07  | -0.03 | 0.06  | -0.03 | 0.18  | -0.02 | 0.09  | 0.02  | 0.07  | 0.02  | 0.09  | 0.00  | NA      | NA   |
| Percent of persons in same residence since 1985         | 0.12  | -0.22 | -0.10 | -0.08 | -0.01 | -0.12 | -0.04 | -0.05 | -0.02 | -0.09 | -0.13 | -0.02 | 0.07  | -0.18 | -0.03 | -0.12 | NA      | NA   |

**Web Table 2.** Changes in census variable between 1990 and 2000 according to changes in neighborhood socioeconomic deprivation index

| Change in Census Variable <sup>a</sup> , Mean (SD) | Change in Percentile of Neighborhood Socioeconomic Deprivation Index |            |            |            |                 |                       |            |            |           |
|----------------------------------------------------|----------------------------------------------------------------------|------------|------------|------------|-----------------|-----------------------|------------|------------|-----------|
|                                                    | Reduced Deprivation                                                  |            |            |            | ≤2.5%<br>Change | Increased Deprivation |            |            |           |
|                                                    | >30%                                                                 | >20–30%    | >10–20%    | >2.5–10%   |                 | >2.5–10%              | >10–20%    | >20–30%    | >30%      |
| Percent of total with less than high school        | -14.3 (8.0)                                                          | -9.4 (5.0) | -7.3 (4.5) | -5.8 (4.4) | -4.0 (4.8)      | -2.0 (4.5)            | -0.1 (5.0) | 2.1 (5.4)  | 6.3 (8.2) |
| Percent of total unemployed                        | -3.1 (3.2)                                                           | -2.3 (2.4) | -1.7 (2.1) | -1.2 (2.2) | -0.1 (3.1)      | 0.8 (2.8)             | 1.6 (2.9)  | 2.4 (3.7)  | 4.2 (6.2) |
| Percent of HH with income below poverty            | -6.4 (5.2)                                                           | -3.2 (3.2) | -1.8 (3.0) | -0.9 (3.0) | 0.6 (3.5)       | 2.0 (3.1)             | 3.1 (3.6)  | 4.3 (3.8)  | 6.8 (6.0) |
| Percent of HH on public assistance                 | -5.8 (5.5)                                                           | -4.2 (2.8) | -3.8 (2.9) | -3.7 (3.5) | -3.9 (4.6)      | -1.9 (2.2)            | -1.2 (1.9) | -0.6 (1.8) | 0.4 (2.5) |
| Percent of HH with no car                          | -5.2 (6.6)                                                           | -2.5 (3.9) | -1.6 (3.3) | -0.9 (3.3) | -0.2 (3.8)      | 1.2 (3.0)             | 2.2 (3.4)  | 3.5 (4.1)  | 6.4 (6.3) |

<sup>a</sup> Because we used different threshold for the income distribution variable in 1990 and 2000 (% households with an income <\$22,500 (1990) or <\$30,000 (2000)), we did not provide a direct comparison for this variable in this table.

**Web Table 3.** Baseline (1995–1996) study characteristics according to exclusion status<sup>a</sup> among 566,388 participants in the National Institutes of Health-AARP Diet and Health Study

| Baseline Characteristic                         | Exclusion Status |                       |
|-------------------------------------------------|------------------|-----------------------|
|                                                 | Included         | Excluded <sup>a</sup> |
| Neighborhood deprivation index, 1990, mean (SD) | 0.02 (2.1)       | -0.02 (2.1)           |
| Age, mean (SD)                                  | 62.2 (5.3)       | 62.1 (5.4)            |
| Female, %                                       | 39.4             | 40.7                  |
| White, non-Hispanic, %                          | 90.2             | 92.3                  |
| Less than high school, %                        | 6.6              | 6.1                   |
| College and post college, %                     | 37.8             | 38.4                  |
| Married, %                                      | 71.2             | 66.4                  |
| Current smoker, %                               | 11.3             | 12.7                  |
| Physical activity $\geq$ 5 times/wk, %          | 19.7             | 18.5                  |
| TV viewing $\leq$ 2 hours/day, %                | 20.5             | 21.7                  |
| Nighttime sleep 7–8 hours/day, %                | 35.8             | 37.0                  |
| Body mass index, kg/m <sup>2</sup> , mean (SD)  | 27.1 (5.0)       | 27.1 (5.2)            |
| alcohol consumption, g/day, mean (SD)           | 13.1 (38.2)      | 13.4 (38.4)           |
| HEI-2005 total score                            | 66.6 (11.5)      | 66.6 (11.5)           |
| Self-reported health, excellent, %              | 16.4             | 16.2                  |
| Self-reported health, poor or fair, %           | 12.5             | 14.4                  |
| Chronic conditions                              |                  |                       |
| Heart disease                                   | 13.6             | 14.8                  |
| Stroke                                          | 2.1              | 2.5                   |
| Cancer                                          | 24.6             | 22.7                  |
| Diabetes                                        | 8.9              | 9.7                   |

Abbreviation: SD, standard deviation.

<sup>a</sup> Participants were excluded if they moved before 2004 ( $n = 263,225$ ), if they died before 2000 ( $n = 14,619$ ), or if they had missing neighborhood information ( $n = 463$ ).

**Web Table 4.** Associations<sup>a</sup> between total mortality and neighborhood socioeconomic deprivation in 1990 and 2000, using three different indicators

| Neighborhood Deprivation |      | Indicator of Neighborhood Deprivation |                   |                   |
|--------------------------|------|---------------------------------------|-------------------|-------------------|
| 1990                     | 2000 | 6-Variable Index                      | 14-Variable Index | Poverty           |
| <i>Women</i>             |      |                                       |                   |                   |
|                          | T1   | Referent                              | Referent          | Referent          |
| T1                       | T2   | 1.07 (1.00, 1.15)                     | 1.09 (1.01, 1.17) | 1.08 (1.01, 1.16) |
|                          | T3   | 1.03 (0.82, 1.31)                     | 1.17 (0.95, 1.44) | 1.18 (0.99, 1.41) |
|                          | T1   | 1.09 (1.01, 1.17)                     | 1.13 (1.05, 1.21) | 1.08 (1.02, 1.16) |
| T2                       | T2   | 1.19 (1.13, 1.24)                     | 1.16 (1.11, 1.22) | 1.15 (1.10, 1.21) |
|                          | T3   | 1.28 (1.20, 1.37)                     | 1.28 (1.20, 1.37) | 1.28 (1.20, 1.37) |
|                          | T1   | 1.16 (0.91, 1.48)                     | 1.24 (1.03, 1.51) | 1.24 (1.07, 1.44) |
| T3                       | T2   | 1.28 (1.19, 1.37)                     | 1.25 (1.17, 1.34) | 1.25 (1.17, 1.33) |
|                          | T3   | 1.42 (1.36, 1.48)                     | 1.43 (1.36, 1.49) | 1.38 (1.32, 1.45) |
| <i>Men</i>               |      |                                       |                   |                   |
|                          | T1   | Referent                              | Referent          | Referent          |
| T1                       | T2   | 1.10 (1.06, 1.15)                     | 1.14 (1.09, 1.19) | 1.10 (1.06, 1.14) |
|                          | T3   | 1.24 (1.08, 1.43)                     | 1.12 (0.99, 1.26) | 1.18 (1.07, 1.31) |
|                          | T1   | 1.12 (1.07, 1.17)                     | 1.10 (1.05, 1.15) | 1.10 (1.06, 1.15) |
| T2                       | T2   | 1.15 (1.12, 1.18)                     | 1.16 (1.13, 1.20) | 1.14 (1.10, 1.17) |
|                          | T3   | 1.27 (1.22, 1.33)                     | 1.26 (1.21, 1.32) | 1.24 (1.19, 1.29) |
|                          | T1   | 1.18 (1.03, 1.36)                     | 1.18 (1.02, 1.38) | 1.23 (1.12, 1.36) |
| T3                       | T2   | 1.22 (1.17, 1.27)                     | 1.22 (1.17, 1.27) | 1.17 (1.13, 1.23) |
|                          | T3   | 1.31 (1.27, 1.34)                     | 1.33 (1.30, 1.37) | 1.30 (1.26, 1.34) |

<sup>a</sup> Adjusted for age (50–<55, 55–<60, 60–<65, ≥65), race/ethnicity (non-Hispanic white, non-Hispanic black, other), education (<12 years, high school graduate, some college, college and post graduate). State of residence (CA, FL, GA, LA, MI, NC, NJ, PA) was included as a random effect.

**Web Table 5.** Total, CVD, and cancer mortality according to neighborhood socioeconomic deprivation in 1990 and 2000: comparison between results from regression models with and without adjustment of neighborhood socioeconomic deprivation in 1990

| Tertile of Neighborhood Socioeconomic Deprivation Index |      | Total Deaths         |                      | CVD Deaths           |                      | Cancer Deaths        |                      |
|---------------------------------------------------------|------|----------------------|----------------------|----------------------|----------------------|----------------------|----------------------|
| 1990                                                    | 2000 | Model 1 <sup>a</sup> | Model 2 <sup>b</sup> | Model 1 <sup>a</sup> | Model 2 <sup>b</sup> | Model 1 <sup>a</sup> | Model 2 <sup>b</sup> |
| <i>Men</i>                                              |      |                      |                      |                      |                      |                      |                      |
| T1<br>(low deprivation)                                 | T1   | Referent             | Referent             | Referent             | Referent             | Referent             | Referent             |
|                                                         | T2   | 1.10 (1.06, 1.15)    | 1.09 (1.05, 1.14)    | 1.17 (1.08, 1.26)    | 1.15 (1.06, 1.24)    | 1.09 (1.02, 1.17)    | 1.08 (1.01, 1.16)    |
|                                                         | T3   | 1.24 (1.08, 1.43)    | 1.23 (1.07, 1.41)    | 1.76 (1.41, 2.19)    | 1.73 (1.39, 2.16)    | 1.03 (0.80, 1.33)    | 1.02 (0.79, 1.32)    |
| T2                                                      | T1   | 1.12 (1.07, 1.17)    | 1.08 (1.04, 1.13)    | 1.21 (1.12, 1.30)    | 1.16 (1.07, 1.25)    | 1.08 (1.01, 1.16)    | 1.06 (0.98, 1.14)    |
|                                                         | T2   | 1.15 (1.12, 1.18)    | 1.10 (1.07, 1.13)    | 1.21 (1.15, 1.28)    | 1.15 (1.09, 1.22)    | 1.11 (1.06, 1.16)    | 1.08 (1.03, 1.14)    |
|                                                         | T3   | 1.27 (1.22, 1.33)    | 1.21 (1.16, 1.27)    | 1.44 (1.33, 1.55)    | 1.35 (1.25, 1.46)    | 1.14 (1.06, 1.23)    | 1.11 (1.02, 1.20)    |
| T3<br>(high deprivation)                                | T1   | 1.18 (1.03, 1.36)    | 1.09 (0.94, 1.26)    | 1.22 (0.95, 1.58)    | 1.11 (0.85, 1.43)    | 1.10 (0.87, 1.40)    | 1.05 (0.82, 1.34)    |
|                                                         | T2   | 1.22 (1.17, 1.27)    | 1.12 (1.07, 1.18)    | 1.33 (1.23, 1.43)    | 1.20 (1.11, 1.31)    | 1.19 (1.11, 1.27)    | 1.13 (1.04, 1.22)    |
|                                                         | T3   | 1.31 (1.27, 1.34)    | 1.15 (1.10, 1.20)    | 1.47 (1.40, 1.54)    | 1.27 (1.18, 1.38)    | 1.15 (1.10, 1.20)    | 1.07 (0.99, 1.16)    |
| <i>Women</i>                                            |      |                      |                      |                      |                      |                      |                      |
| T1<br>(low deprivation)                                 | T1   | Referent             | Referent             | Referent             | Referent             | Referent             | Referent             |
|                                                         | T2   | 1.07 (1.00, 1.15)    | 1.07 (1.00, 1.15)    | 1.41 (1.23, 1.61)    | 1.40 (1.22, 1.61)    | 0.90 (0.81, 1.02)    | 0.90 (0.80, 1.01)    |
|                                                         | T3   | 1.03 (0.82, 1.31)    | 1.01 (0.80, 1.28)    | 0.87 (0.51, 1.51)    | 0.86 (0.49, 1.48)    | 0.87 (0.59, 1.28)    | 0.86 (0.58, 1.27)    |
| T2                                                      | T1   | 1.09 (1.01, 1.17)    | 1.06 (0.99, 1.14)    | 1.21 (1.05, 1.41)    | 1.18 (1.02, 1.37)    | 1.05 (0.94, 1.18)    | 1.04 (0.93, 1.17)    |
|                                                         | T2   | 1.19 (1.13, 1.24)    | 1.15 (1.10, 1.21)    | 1.44 (1.31, 1.59)    | 1.39 (1.26, 1.54)    | 1.02 (0.95, 1.10)    | 1.01 (0.93, 1.09)    |
|                                                         | T3   | 1.28 (1.20, 1.37)    | 1.24 (1.16, 1.33)    | 1.56 (1.36, 1.78)    | 1.49 (1.30, 1.71)    | 1.13 (1.02, 1.26)    | 1.11 (0.99, 1.24)    |
| T3<br>(high deprivation)                                | T1   | 1.16 (0.91, 1.48)    | 1.12 (0.87, 1.42)    | 1.34 (0.83, 2.17)    | 1.27 (0.78, 2.06)    | 0.82 (0.53, 1.27)    | 0.81 (0.52, 1.26)    |
|                                                         | T2   | 1.28 (1.19, 1.37)    | 1.22 (1.13, 1.31)    | 1.70 (1.49, 1.94)    | 1.60 (1.39, 1.84)    | 0.99 (0.88, 1.11)    | 0.97 (0.86, 1.10)    |
|                                                         | T3   | 1.42 (1.36, 1.48)    | 1.32 (1.24, 1.40)    | 1.78 (1.63, 1.95)    | 1.61 (1.42, 1.81)    | 1.18 (1.10, 1.27)    | 1.14 (1.03, 1.27)    |

<sup>a</sup> adjusted for age (50–<55, 55–<60, 60–<65, ≥65), race/ethnicity (non-Hispanic white, non-Hispanic black, other), and education (<12 years, high school graduate, some college, college and post graduate). State of residence (CA, FL, GA, LA, MI, NC, NJ, PA) was included as a random effect.

<sup>b</sup> adjusted for all the covariates in footnote <sup>a</sup> and additionally included neighborhood socioeconomic deprivation in 1990 as a covariate (continuous)



**Web Table 6.** Association between reduction in neighborhood socioeconomic deprivation and total mortality in men and women who lived in neighborhoods with more socioeconomic deprivation (index score > median) in 1990

|                                   | Less Than 2.5% Reduction or Increased Deprivation | Reduction in Deprivation |                   |                   |                   | Per 5 Percentile Point Reduction | P-Trend |
|-----------------------------------|---------------------------------------------------|--------------------------|-------------------|-------------------|-------------------|----------------------------------|---------|
|                                   |                                                   | >2.5–10%                 | >10–20%           | >20–30%           | >30%              |                                  |         |
| <i>Men</i>                        |                                                   |                          |                   |                   |                   |                                  |         |
| No. of deaths                     | 12194                                             | 5365                     | 3750              | 1340              | 818               |                                  |         |
| HR (95% CI), model 1 <sup>a</sup> | Referent                                          | 0.95 (0.92, 0.99)        | 0.94 (0.91, 0.98) | 0.92 (0.87, 0.97) | 0.89 (0.83, 0.95) | 1.011 (1.006, 1.016)             | <.0001  |
| HR (95% CI), model 2 <sup>b</sup> | Referent                                          | 0.95 (0.92, 0.99)        | 0.96 (0.93, 1.00) | 0.94 (0.89, 1.00) | 0.90 (0.84, 0.97) | 1.012 (1.007, 1.018)             | <.0001  |
| <i>Women</i>                      |                                                   |                          |                   |                   |                   |                                  |         |
| No. of deaths                     | 6575                                              | 2548                     | 4587              | 487               | 293               |                                  |         |
| HR (95% CI), model 1 <sup>a</sup> | Referent                                          | 0.97 (0.92, 1.01)        | 0.93 (0.88, 0.99) | 0.84 (0.76, 0.92) | 0.81 (0.72, 0.91) | 1.020 (1.012, 1.027)             | <.0001  |
| HR (95% CI), model 2 <sup>b</sup> | Referent                                          | 0.97 (0.92, 1.01)        | 0.95 (0.90, 1.00) | 0.86 (0.78, 0.94) | 0.82 (0.73, 0.92) | 1.021 (1.014, 1.029)             | <.0001  |

<sup>a</sup> Adjusted for age (50–<55, 55–<60, 60–<65, ≥65), race/ethnicity (non-Hispanic white, non-Hispanic black, other), and education (<12 years, high school graduate, some college, college and post graduate). State of residence (CA, FL, GA, LA, MI, NC, NJ, PA) was included as a random effect.

<sup>b</sup> Adjusted for all the covariates in footnote <sup>a</sup> and additionally included neighborhood socioeconomic deprivation in 1990 as a covariate (continuous)

**Web Table 7.** Association between increase in neighborhood socioeconomic deprivation and total mortality in men and women who lived in neighborhoods with less socioeconomic deprivation (index score  $\leq$  median) in 1990

|                                   | Less Than 2.5% Increase or Reduced Deprivation | Increase in Deprivation |                   |                   |                   | Per 5 Percentile Point Increase | <i>p</i> -Trend |
|-----------------------------------|------------------------------------------------|-------------------------|-------------------|-------------------|-------------------|---------------------------------|-----------------|
|                                   |                                                | >2.5–10%                | >10–20%           | >20–30%           | >30%              |                                 |                 |
| MEN                               |                                                |                         |                   |                   |                   |                                 |                 |
| No. of deaths                     | 11188                                          | 4256                    | 3024              | 1379              | 887               |                                 |                 |
| HR (95% CI), model 1 <sup>a</sup> | Referent                                       | 1.01 (0.97, 1.04)       | 1.04 (1.00, 1.08) | 1.10 (1.04, 1.16) | 1.11 (1.03, 1.18) | 1.007 (1.002, 1.012)            | 0.008           |
| HR (95% CI), model 2 <sup>b</sup> | Referent                                       | 1.02 (0.99, 1.06)       | 1.04 (1.00, 1.08) | 1.09 (1.03, 1.15) | 1.10 (1.03, 1.18) | 1.010 (1.005, 1.015)            | 0.0001          |
| WOMEN                             |                                                |                         |                   |                   |                   |                                 |                 |
| No. of deaths                     | 3736                                           | 1512                    | 1158              | 552               | 370               |                                 |                 |
| HR (95% CI), model 1 <sup>a</sup> | Referent                                       | 1.01 (0.95, 1.07)       | 1.04 (0.98, 1.12) | 1.08 (0.99, 1.19) | 1.07 (0.96, 1.19) | 1.006 (0.998, 1.014)            | 0.14            |
| HR (95% CI), model 2 <sup>b</sup> | Referent                                       | 1.02 (0.96, 1.09)       | 1.04 (0.98, 1.11) | 1.08 (0.99, 1.18) | 1.07 (0.96, 1.19) | 1.008 (1.000, 1.016)            | 0.05            |

<sup>a</sup> Adjusted for age (50–<55, 55–<60, 60–<65,  $\geq$ 65), race/ethnicity (non-Hispanic white, non-Hispanic black, other), and education (<12 years, high school graduate, some college, college and post graduate). State of residence (CA, FL, GA, LA, MI, NC, NJ, PA) was included as a random effect.

<sup>b</sup> Adjusted for all the covariates in footnote <sup>a</sup> and additionally included neighborhood socioeconomic deprivation in 1990 as a covariate (continuous).

**Web Table 8.** Association between changes in neighborhood socioeconomic deprivation and total mortality among women who lived in neighborhoods with a socioeconomic deprivation index higher than median in 1990, by health and disease status

|                                  | Less Than 2.5% Reduction or Increased Deprivation | Reduction in Deprivation |                   |                   |                   | Per 5 Percentile Point Reduction | <i>p</i> -Trend |
|----------------------------------|---------------------------------------------------|--------------------------|-------------------|-------------------|-------------------|----------------------------------|-----------------|
|                                  |                                                   | >2.5–10%                 | >10–20%           | >20–30%           | >30%              |                                  |                 |
| <i>MEN</i>                       |                                                   |                          |                   |                   |                   |                                  |                 |
| <i>More healthy</i> <sup>a</sup> |                                                   |                          |                   |                   |                   |                                  |                 |
| No. of deaths                    | 2979                                              | 1254                     | 852               | 321               | 219               |                                  |                 |
| HR (95% CI) <sup>c</sup>         | Referent                                          | 0.92 (0.86, 0.99)        | 0.88 (0.81, 0.95) | 0.90 (0.80, 1.01) | 0.93 (0.81, 1.07) | 1.013 (1.002, 1.023)             | 0.02            |
| <i>Less healthy</i> <sup>b</sup> |                                                   |                          |                   |                   |                   |                                  |                 |
| No. of deaths                    | 9109                                              | 4070                     | 2872              | 1011              | 596               |                                  |                 |
| HR (95% CI) <sup>c</sup>         | Referent                                          | 0.96 (0.93, 1.00)        | 0.97 (0.93, 1.02) | 0.93 (0.87, 0.99) | 0.90 (0.83, 0.98) | 1.009 (1.003, 1.015)             | 0.002           |
| <i>WOMEN</i>                     |                                                   |                          |                   |                   |                   |                                  |                 |
| <i>More healthy</i> <sup>a</sup> |                                                   |                          |                   |                   |                   |                                  |                 |
| No. of deaths                    | 1784                                              | 724                      | 456               | 140               | 85                |                                  |                 |
| HR (95% CI) <sup>c</sup>         | Referent                                          | 1.00 (0.92, 1.09)        | 0.96 (0.87, 1.07) | 0.83 (0.70, 0.98) | 0.85 (0.68, 1.06) | 1.019 (1.005, 1.033)             | 0.009           |
| <i>Less healthy</i> <sup>b</sup> |                                                   |                          |                   |                   |                   |                                  |                 |
| No. of deaths                    | 4711                                              | 1788                     | 1114              | 343               | 206               |                                  |                 |
| HR (95% CI) <sup>c</sup>         | Referent                                          | 0.95 (0.90, 1.00)        | 0.93 (0.87, 0.99) | 0.90 (0.80, 1.00) | 0.79 (0.68, 0.90) | 1.019 (1.010, 1.029)             | <.0001          |

<sup>a</sup> Defined as no history of heart disease, stroke, cancer or diabetes at baseline and excellent, very good and good self-rated health.

<sup>b</sup> Defined as with a history of heart disease, stroke, cancer or diabetes at baseline or fair and poor self-rated health.

<sup>c</sup> Adjusted for age (50–<55, 55–<60, 60–<65, ≥65), race/ethnicity (non-Hispanic white, non-Hispanic black, other), and education (<12 years, high school graduate, some college, college and post graduate). State of residence (CA, FL, GA, LA, MI, NC, NJ, PA) was included as a random effect.

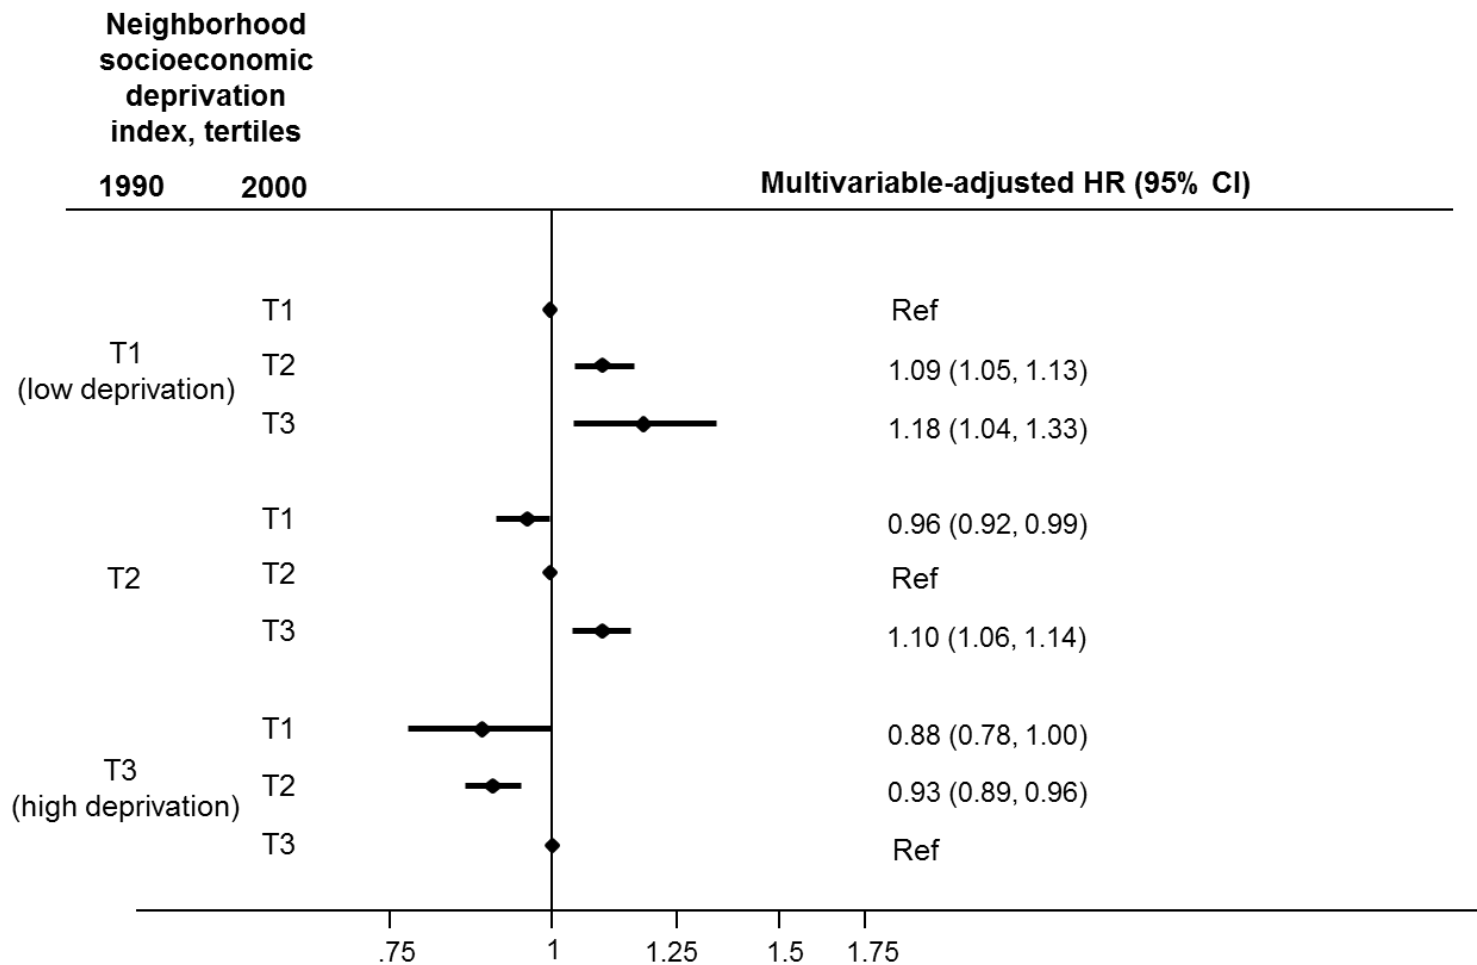

**Web Figure 1.** Hazard ratios (HRs) and 95% confidence intervals (CIs) for the association between tertiles of neighborhood socioeconomic deprivation in 1990 and 2000 and total mortality. Models were adjusted for age (50–<55, 55–<60, 60–<65, ≥65), race/ethnicity (non-Hispanic white, non-Hispanic black, other), and education (<12 years, high school graduate, some college, college and post graduate). State of residence (CA, FL, GA, LA, MI, NC, NJ, PA) was included as a random effect.

## References

1. Messer LC, Laraia BA, Kaufman JS, et al. The development of a standardized neighborhood deprivation index. *J Urban Health*. 2006;83(6):1041–1062.
2. Major JM, Doubeni CA, Freedman ND, et al. Neighborhood socioeconomic deprivation and mortality: NIH-AARP diet and health study. *PLoS One*. 2010;5(11):e15538.
3. Glymour MM, Weuve J, Berkman LF, Kawachi I, Robins JM. When is baseline adjustment useful in analyses of change? An example with education and cognitive change. *Am J Epidemiol*. 2005;162(3):267–278.
4. Seaman SR, White IR. Review of inverse probability weighting for dealing with missing data. *Stat Methods Med Res*. 2013;22(3):278–295.
